# Supplementary material for: On the interplay of borderline personality features, childhood trauma severity, attachment types, and social support
Source: PubMed Central journal article supplement (PMC9762015; doi:10.1186/s40479-022-00206-9), 2022-12-19
Supplement: 40479_2022_206_MOESM1_ESM.pdf [file 40479_2022_206_MOESM1_ESM.pdf]

## Supplementary Material

### **On the Interplay between Borderline Personality Features, Childhood Trauma, Attachment Types, and Social Support**

Anna Schulze <sup>1</sup>, Leonie Cloos<sup>2,3</sup>, Monika Zdravkovic<sup>2</sup>, Stefanie Lis <sup>1,4\*</sup>, Annegret Krause-Utz <sup>2\*</sup>

\* contributed equally

<sup>1</sup> Department of Clinical Psychology, Central Institute of Mental Health, Mannheim, Germany; Medical Faculty, University of Heidelberg, Mannheim, Germany

<sup>2</sup> Institute of Clinical Psychology, Leiden University, Leiden, The Netherlands

<sup>3</sup> Research Group of Quantitative Psychology and Individual Differences, Faculty of Psychology and Educational Sciences, KU Leuven, Belgium

<sup>4</sup> Department of Psychosomatic Medicine and Psychotherapy, Central Institute of Mental Health, Mannheim, Germany; Medical Faculty, University of Heidelberg, Mannheim, Germany

## Supplementary Material Network N1

**Table S1**

*Frequencies of severity categories of childhood maltreatment of N1 sample*

|                   | none to<br>minimal<br>N (%) | slight to<br>moderate<br>N (%) | moderate to<br>severe<br>N (%) | severe to<br>extreme<br>N (%) |
|-------------------|-----------------------------|--------------------------------|--------------------------------|-------------------------------|
| emotional abuse   | 525 (31.21)                 | 679 (40.37)                    | 142 (8.44)                     | 336 (19.98)                   |
| physical abuse    | 716 (42.57)                 | 154 (9.16)                     | 442 (26.28)                    | 370 (22.00)                   |
| sexual abuse      | 761 (45.24)                 | 150 (8.92)                     | 639 (37.99)                    | 132 (7.85)                    |
| emotional neglect | 164 (9.75)                  | 482 (28.66)                    | 599 (35.61)                    | 437 (25.98)                   |
| physical neglect  | 366 (21.76)                 | 1072 (63.73)                   | 190 (11.30)                    | 54 (3.21)                     |

Note. N = 1682

**Table S2**

*Spearman Correlations of Nodes in Network N1*

|        | Sex   | Age   | PAI_AI | PAI_ID | PAI_NR | PAI_SH | CTQ_EA | CTQ_PA | CTQ_SA | CTQ_EN | CTQ_PN |
|--------|-------|-------|--------|--------|--------|--------|--------|--------|--------|--------|--------|
| Sex    |       | .006  | .000   | .000   | .000   | .413   | .000   | .339   | .005   | .001   | .000   |
| Age    | .068  |       | .491   | .001   | .001   | .725   | .000   | .130   | .285   | .103   | .162   |
| PAI_AI | -.116 | -.017 |        | .000   | .000   | .000   | .000   | .122   | .110   | .468   | .280   |
| PAI_ID | -.126 | -.079 | .615   |        | .000   | .000   | .000   | .331   | .014   | .000   | .070   |
| PAI_NR | -.137 | .078  | .544   | .583   |        | .000   | .000   | .899   | .510   | .071   | .014   |
| PAI_SH | -.020 | .009  | .397   | .420   | .413   |        | .000   | .021   | .285   | .251   | .175   |
| CTQ_EA | -.134 | .143  | .249   | .403   | .388   | .279   |        | .000   | .000   | .000   | .000   |
| CTQ_PA | -.023 | -.037 | -.038  | .024   | .003   | -.056  | .401   |        | .000   | .000   | .000   |
| CTQ_SA | -.068 | .026  | .039   | .060   | .016   | -.026  | .305   | .592   |        | .000   | .000   |
| CTQ_EN | .082  | .040  | .018   | .089   | .044   | .028   | .355   | .497   | .419   |        | .000   |
| CTQ_PN | .103  | .034  | -.026  | -.044  | -.060  | -.033  | -.085  | .111   | .132   | .192   |        |

Note. Spearman's correlation coefficients (below diagonal) and *p*-values (above diagonal)

**Table S3**

*Edge Weights in Network N1*

|        | Sex   | Age   | PAI_AI | PAI_ID | PAI_NR | PAI_SH | CTQ_EA | CTQ_PA | CTQ_SA | CTQ_EN |
|--------|-------|-------|--------|--------|--------|--------|--------|--------|--------|--------|
| Age    | .149  |       |        |        |        |        |        |        |        |        |
| PAI_AI | .000  | .000  |        |        |        |        |        |        |        |        |
| PAI_ID | .000  | -.177 | .376   |        |        |        |        |        |        |        |
| PAI_NR | .000  | .000  | .237   | .257   |        |        |        |        |        |        |
| PAI_SH | .000  | -.065 | .144   | .143   | .114   |        |        |        |        |        |
| CTQ_EA | -.196 | .254  | .000   | .215   | .172   | .143   |        |        |        |        |
| CTQ_PA | .000  | -.114 | .000   | .000   | .000   | .000   | .286   |        |        |        |
| CTQ_SA | -.174 | .138  | .000   | .000   | .000   | .000   | .074   | .353   |        |        |
| CTQ_EN | .191  | .000  | .000   | .000   | .000   | .000   | .138   | .306   | .079   |        |
| CTQ_PN | .000  | .000  | .000   | .000   | .000   | .000   | .000   | .056   | .046   | .073   |

Note. Partial correlation coefficients.

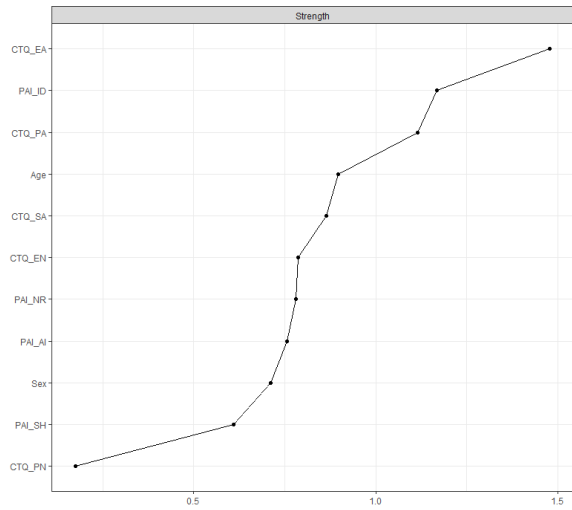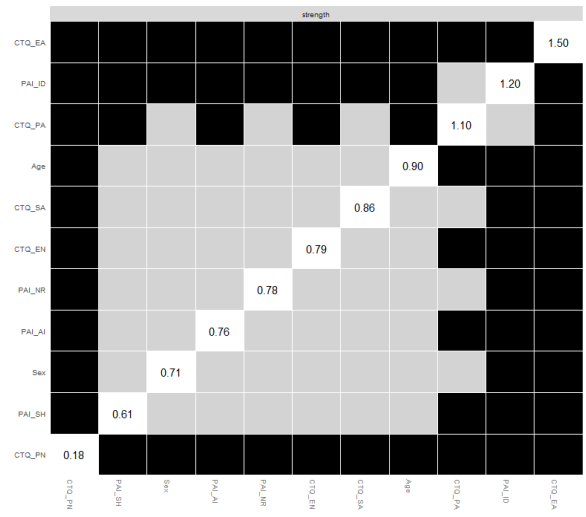

Fig. S1. Centrality values and bootstrapped difference test of network N1

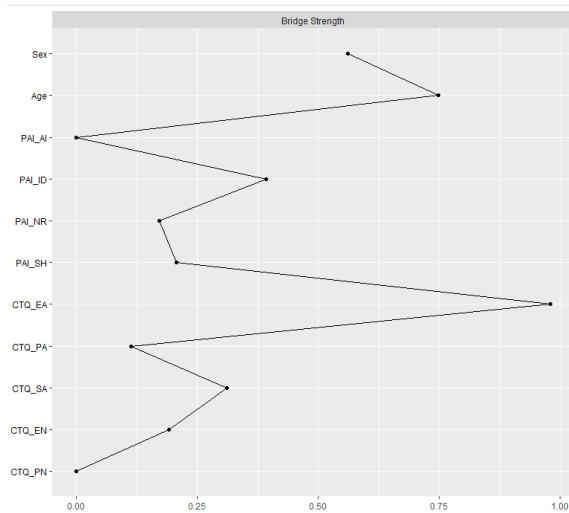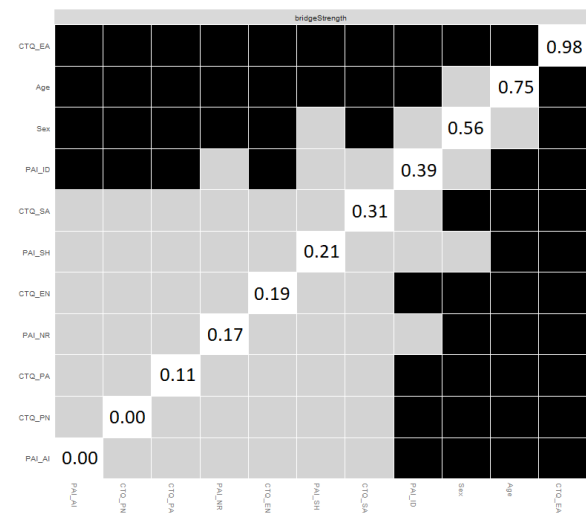

Fig. S2. Bridge strength and bootstrapped difference test of network N1

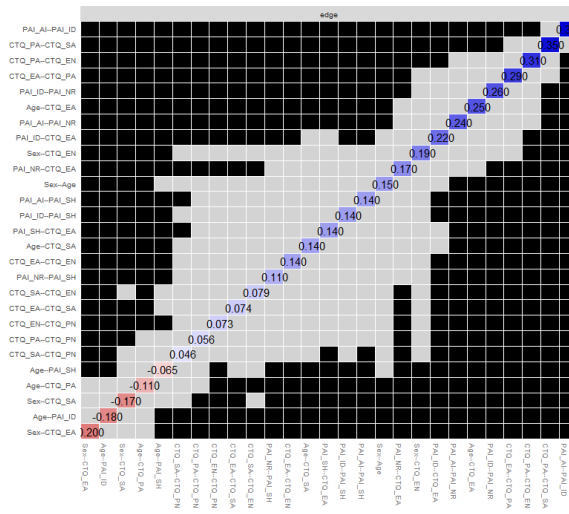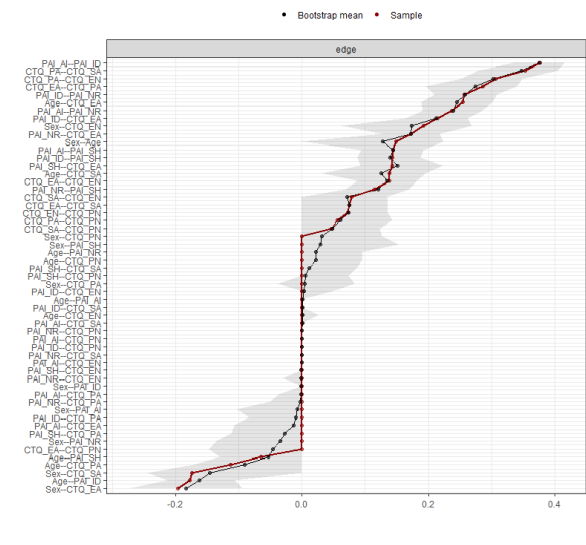

Fig. S3. Bootstrapped Difference Test of Edge Weights N1

## Supplementary Material Network N2

**Table S4**

*Frequencies of severity categories of childhood maltreatment of N2 sample*

|                   | none to<br>minimal<br>N (%) | slight to<br>moderate<br>N (%) | moderate to<br>severe<br>N (%) | severe to<br>extreme<br>N (%) |
|-------------------|-----------------------------|--------------------------------|--------------------------------|-------------------------------|
| emotional abuse   | 366 (33.21)                 | 346 (31.40)                    | 105 (9.53)                     | 285 (25.86)                   |
| physical abuse    | 569 (51.63)                 | 108 (9.80)                     | 224 (20.33)                    | 201 (18.24)                   |
| sexual abuse      | 613 (55.63)                 | 88 (7.80)                      | 301 (27.31)                    | 98 (8.89)                     |
| emotional neglect | 131 (11.89)                 | 366 (33.21)                    | 329 (29.85)                    | 276 (25.04)                   |
| physical neglect  | 281 (25.50)                 | 647 (58.71)                    | 132 (11.98)                    | 42 (3.81)                     |

Note. N = 1102.

**Table S5**

*Spearman Correlations of Nodes in Network N2*

|        | Sex   | Age   | PAI_AI | PAI_ID | PAI_NR | PAI_SH | CTQ_EA | CTQ_PA | CTQ_SA | CTQ_EN | CTQ_PN | ATT_AC | ATT_AD | ATT_AA | SS_FA | SS_FR | SS_FR |
|--------|-------|-------|--------|--------|--------|--------|--------|--------|--------|--------|--------|--------|--------|--------|-------|-------|-------|
| Sex    |       | .035  | .000   | .000   | .000   | .308   | .000   | .053   | .000   | .000   | .002   | .005   | .000   | .000   | .661  | .926  | .000  |
| Age    | .063  |       | .837   | .002   | .036   | .636   | .000   | .790   | .019   | .028   | .091   | .000   | .000   | .921   | .000  | .000  | .070  |
| PAI_AI | -.133 | .007  |        | .000   | .000   | .000   | .000   | .418   | .006   | .018   | .166   | .000   | .000   | .000   | .000  | .000  | .000  |
| PAI_ID | -.125 | -.091 | .598   |        | .000   | .000   | .000   | .001   | .002   | .000   | .019   | .000   | .000   | .000   | .000  | .000  | .000  |
| PAI_NR | -.136 | .064  | .536   | .587   |        | .000   | .000   | .000   | .002   | .000   | .015   | .000   | .000   | .000   | .000  | .000  | .000  |
| PAI_SH | -.031 | -.014 | .396   | .439   | .431   |        | .000   | .414   | .319   | .002   | .258   | .000   | .000   | .000   | .000  | .000  | .000  |
| CTQ_EA | -.153 | .153  | .280   | .433   | .430   | .330   |        | .000   | .000   | .000   | .000   | .000   | .000   | .000   | .000  | .000  | .000  |
| CTQ_PA | -.060 | -.008 | .025   | .104   | .129   | .025   | .486   |        | .000   | .000   | .000   | .000   | .000   | .000   | .000  | .003  | .014  |
| CTQ_SA | -.114 | .071  | .084   | .094   | .097   | .030   | .327   | .565   |        | .000   | .000   | .001   | .005   | .140   | .003  | .011  | .935  |
| CTQ_EN | .038  | .065  | .070   | .168   | .127   | .094   | .455   | .514   | .434   |        | .000   | .000   | .000   | .000   | .000  | .000  | .000  |
| CTQ_PN | .095  | .051  | -.042  | -.071  | -.073  | -.034  | -.106  | .090   | .176   | .162   |        | .962   | .664   | .013   | .926  | .869  | .363  |
| ATT_AC | .085  | -.130 | -.283  | -.337  | -.328  | -.200  | -.395  | -.126  | -.101  | -.248  | -.001  |        | .000   | .000   | .000  | .000  | .000  |
| ATT_AD | .116  | -.200 | -.360  | -.463  | -.512  | -.307  | -.530  | -.150  | -.086  | -.265  | .013   | .666   |        | .000   | .000  | .000  | .000  |
| ATT_AA | -.135 | .004  | .477   | .713   | .570   | .383   | .500   | .112   | .046   | .193   | -.075  | -.456  | -.655  |        | .000  | .000  | .000  |
| SS_FA  | -.016 | -.189 | -.234  | -.378  | -.391  | -.272  | -.581  | -.175  | -.089  | -.432  | .003   | .423   | .558   | -.453  |       | .000  | .000  |
| SS_FR  | .000  | -.110 | -.183  | -.298  | -.293  | -.142  | -.294  | -.087  | -.075  | -.235  | -.005  | .432   | .520   | -.363  | .469  |       | .000  |
| SS_SO  | -.137 | -.054 | -.119  | -.216  | -.212  | -.107  | -.194  | -.072  | -.001  | -.223  | -.027  | .299   | .370   | -.267  | .441  | .464  |       |

Note. Spearman's correlation coefficients (below diagonal) and *p*-values (above diagonal)

**Table S6***Edge Weights in Network N2*

|        | Sex   | Age   | PAI<br>_AI | PAI<br>_ID | PAI<br>_NR | PAI<br>_SH | CTQ<br>_EA | CTQ<br>_PA | CTQ<br>_SA | CTQ<br>_EN | CTQ<br>_PN | ATT<br>_AC | ATT<br>_AD | ATT<br>_AA | SS_FA | SS_FR |
|--------|-------|-------|------------|------------|------------|------------|------------|------------|------------|------------|------------|------------|------------|------------|-------|-------|
| Age    | .084  |       |            |            |            |            |            |            |            |            |            |            |            |            |       |       |
| PAL_AI | .000  | .000  |            |            |            |            |            |            |            |            |            |            |            |            |       |       |
| PAL_ID | .000  | .000  | .281       |            |            |            |            |            |            |            |            |            |            |            |       |       |
| PAL_NR | .000  | .000  | .210       | .148       |            |            |            |            |            |            |            |            |            |            |       |       |
| PAL_SH | .000  | -.050 | .136       | .144       | .100       |            |            |            |            |            |            |            |            |            |       |       |
| CTQ_EA | -.129 | .060  | .000       | .000       | .052       | .108       |            |            |            |            |            |            |            |            |       |       |
| CTQ_PA | .000  | .000  | .000       | .000       | .000       | .000       | .285       |            |            |            |            |            |            |            |       |       |
| CTQ_SA | .000  | .081  | .000       | .000       | .000       | .000       | .087       | .268       |            |            |            |            |            |            |       |       |
| CTQ_EN | .000  | .000  | .000       | .000       | .000       | .000       | .000       | .207       | .047       |            |            |            |            |            |       |       |
| CTQ_PN | .000  | .000  | .000       | .000       | .000       | .000       | -.056      | .048       | .063       | .000       |            |            |            |            |       |       |
| ATT_AC | .000  | .000  | .000       | .000       | .000       | .000       | .000       | .000       | .000       | .000       | .000       |            |            |            |       |       |
| ATT_AD | .000  | -.090 | .000       | .000       | -.109      | .000       | -.100      | .000       | .000       | .000       | .000       | .436       |            |            |       |       |
| ATT_AA | .000  | .000  | .000       | .436       | .064       | .000       | .074       | .000       | .000       | .000       | .000       | .000       | -.316      |            |       |       |
| SS_FA  | .000  | .000  | .000       | .000       | .000       | .000       | -.379      | .000       | .000       | -.210      | .000       | .000       | .123       | .000       |       |       |
| SS_FR  | .000  | .000  | .000       | .000       | .000       | .000       | .000       | .000       | .000       | .000       | .000       | .080       | .183       | .000       | .095  |       |
| SS_SO  | -.148 | .000  | .000       | .000       | .000       | .000       | .000       | .000       | .000       | .000       | .000       | .000       | .052       | .000       | .156  | .260  |

*Note.* Partial correlation coefficients.

**Table S7***Bridge Strength to Different Communities in Network N2*

|       | bridge to |      |      |       |
|-------|-----------|------|------|-------|
|       | CTQ       | PAI  | AAS  | MSPSS |
| CTQ   |           |      |      |       |
| EA    |           | .160 | .175 | .379  |
| PA    |           | .000 | .000 | .000  |
| SA    |           | .000 | .000 | .000  |
| EN    |           | .000 | .000 | .210  |
| PN    |           | .000 | .000 | .000  |
| PAI   |           |      |      |       |
| AI    | .000      |      | .000 | .000  |
| ID    | .000      |      | .436 | .000  |
| NR    | .052      |      | .174 | .000  |
| SH    | .108      |      | .000 | .000  |
| AAS   |           |      |      |       |
| AA    | .000      | .000 |      | .080  |
| AD    | .100      | .109 |      | .358  |
| AC    | .074      | .500 |      | .000  |
| MSPSS |           |      |      |       |
| FA    | .589      | .000 | .123 |       |
| FR    | .000      | .000 | .262 |       |
| SO    | .000      | .000 | .052 |       |

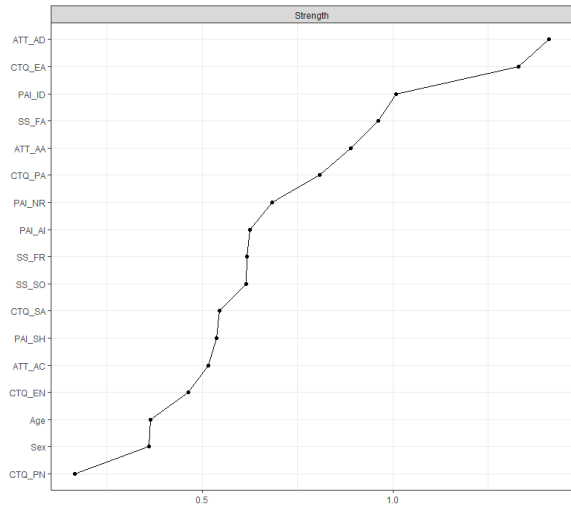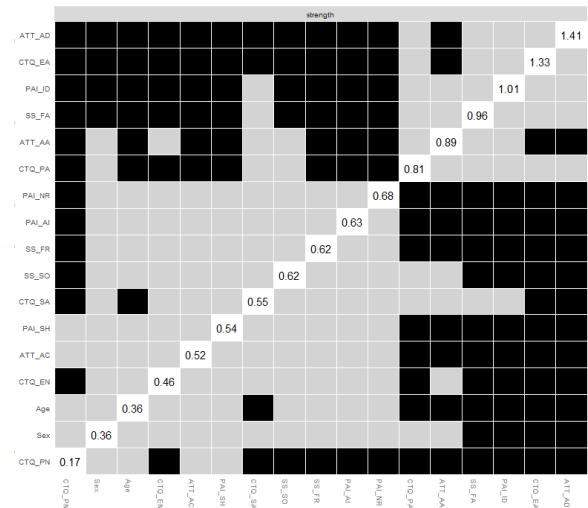

Fig. S4. Centrality values and bootstrapped difference test of network N2

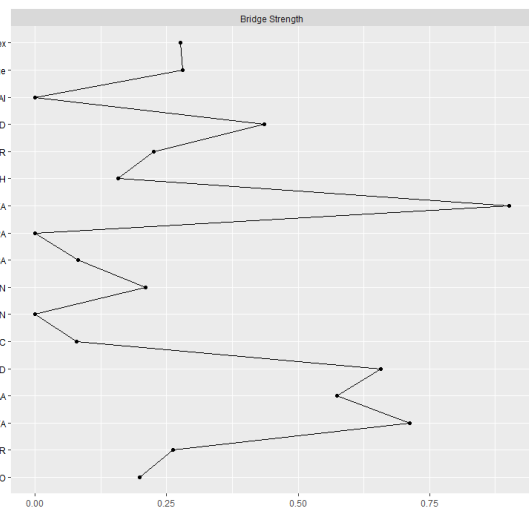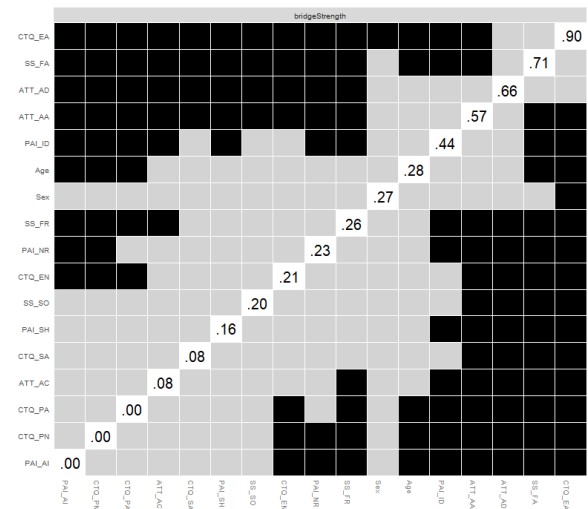

Fig. S5. Bridge strength and bootstrapped difference test of network N2

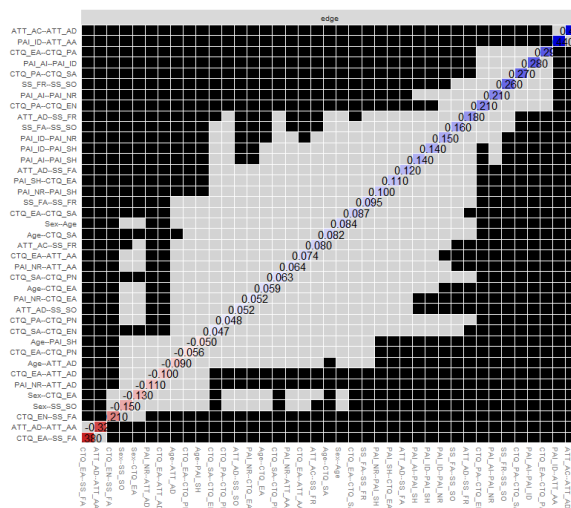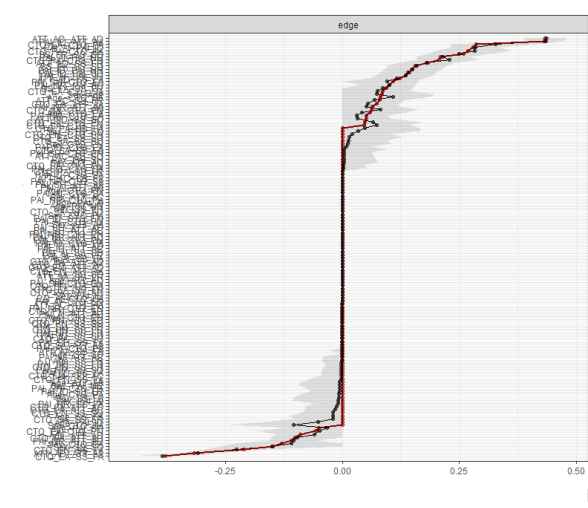

Fig. S6. Bootstrapped Difference Test of Edge Weights N2

## Supplementary Material Network N3 (N1 with sample of N2)

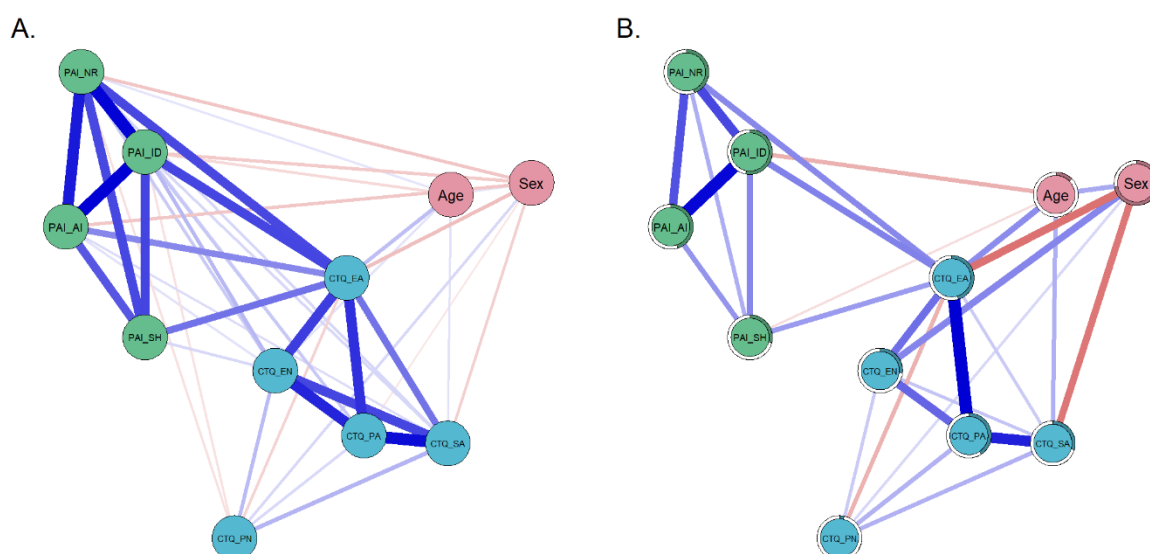

Fig. S7: Relations between the elements of network N3. A. Spearman correlation coefficients. B. Regularized partial correlation network, estimated via *mgm* with edges signifying unique associations between nodes. Note: In both figures the thickness of a line indicates the strength of the connection with blue colour indicating positive correlation and red the negative ones. The coloured part of the circular ring around the nodes represents the predictability of the node by its connected nodes ( $R^2$ ).

**Table S8**

*Spearman Correlations of Nodes in Network N3*

|        | Sex   | Age   | PAI_AI | PAI_ID | PAI_NR | PAI_SH | CTQ_EA | CTQ_PA | CTQ_SA | CTQ_EN | CTQ_PN |
|--------|-------|-------|--------|--------|--------|--------|--------|--------|--------|--------|--------|
| Sex    |       | .037  | .000   | .000   | .000   | .304   | .000   | .047   | .000   | .208   | .002   |
| Age    | .063  |       | .826   | .003   | .035   | .640   | .000   | .800   | .019   | .030   | .091   |
| PAI_AI | -.133 | .000  |        | .000   | .000   | .000   | .000   | .400   | .006   | .021   | .165   |
| PAI_ID | -.125 | -.071 | .600   |        | .000   | .000   | .000   | .001   | .002   | .000   | .019   |
| PAI_NR | -.136 | .064  | .536   | .587   |        | .000   | .000   | .000   | .001   | .000   | .015   |
| PAI_SH | .000  | .000  | .396   | .439   | .431   |        | .000   | .409   | .316   | .002   | .258   |
| CTQ_EA | -.153 | .153  | .280   | .433   | .430   | .330   |        | .000   | .000   | .000   | .000   |
| CTQ_PA | -.060 | .000  | .000   | .104   | .129   | .000   | .486   |        | .000   | .000   | .003   |
| CTQ_SA | -.114 | .071  | .084   | .094   | .097   | .000   | .328   | .565   |        | .000   | .000   |
| CTQ_EN | .000  | .065  | .070   | .168   | .127   | .094   | .455   | .514   | .437   |        | .000   |
| CTQ_PN | .095  | .000  | .000   | -.071  | -.073  | .000   | -.106  | .090   | .176   | .162   |        |

Note. Spearman's correlation coefficients (below diagonal) and  $p$ -values (above diagonal)

**Table S9**

*Edge Weights in Network N3*

|        | Sex   | Age   | PAI_AI | PAI_ID | PAI_NR | PAI_SH | CTQ_EA | CTQ_PA | CTQ_SA | CTQ_EN |
|--------|-------|-------|--------|--------|--------|--------|--------|--------|--------|--------|
| Age    | .118  |       |        |        |        |        |        |        |        |        |
| PAI_AI | .000  | .000  |        |        |        |        |        |        |        |        |
| PAI_ID | .000  | -.108 | .340   |        |        |        |        |        |        |        |
| PAI_NR | .000  | .000  | .239   | .252   |        |        |        |        |        |        |
| PAI_SH | .000  | -.050 | .147   | .167   | .112   |        |        |        |        |        |
| CTQ_EA | -.195 | .159  | .000   | .174   | .163   | .138   |        |        |        |        |
| CTQ_PA | .000  | .000  | .000   | .000   | .000   | .000   | .350   |        |        |        |
| CTQ_SA | -.189 | .110  | .000   | .000   | .000   | .000   | .073   | .305   |        |        |
| CTQ_EN | .167  | .000  | .000   | .000   | .000   | .000   | .199   | .213   | .082   |        |
| CTQ_PN | .055  | .000  | .000   | .000   | .000   | .000   | -.106  | .106   | .108   | .073   |

Note. Partial correlation coefficients.

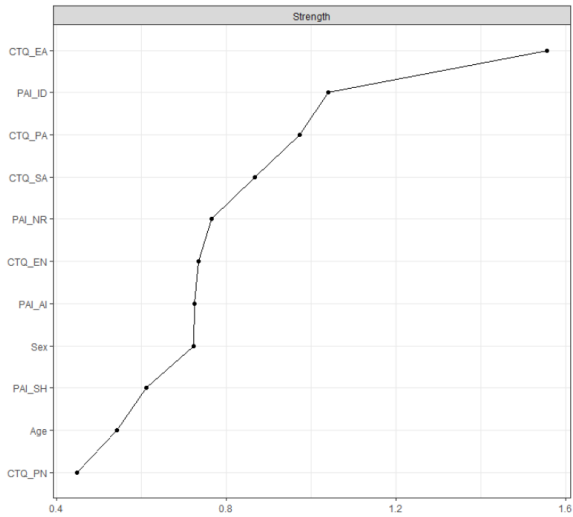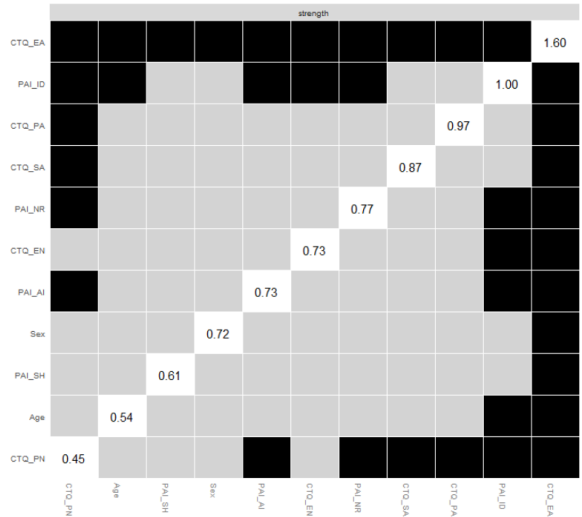

Fig. S8. Centrality values and bootstrapped difference test of network N3

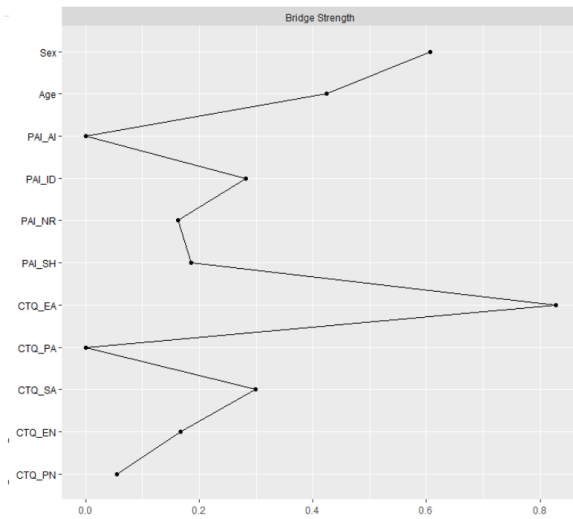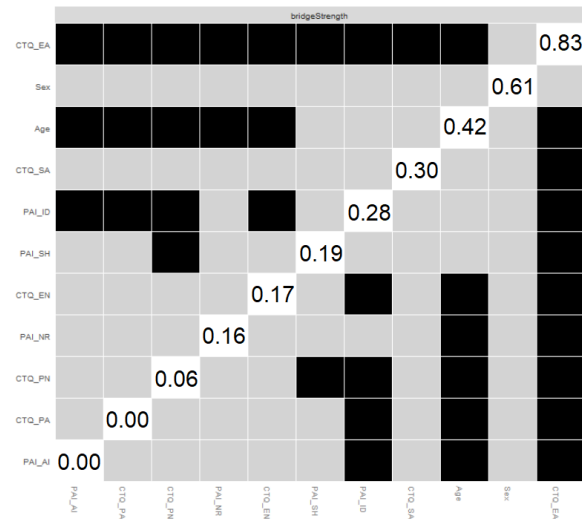

Fig. S9. Bridge strength and bootstrapped difference test of network N3

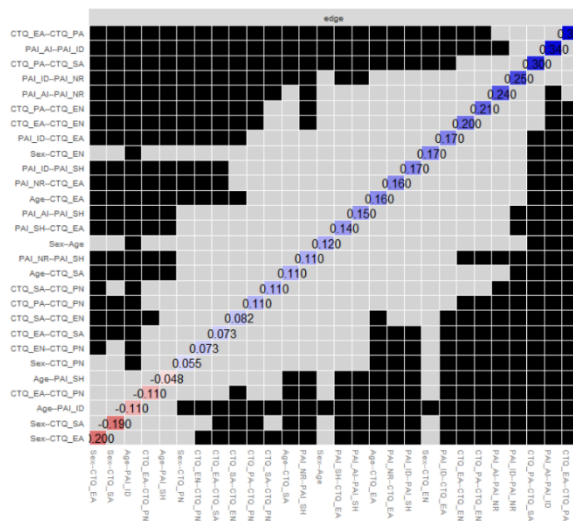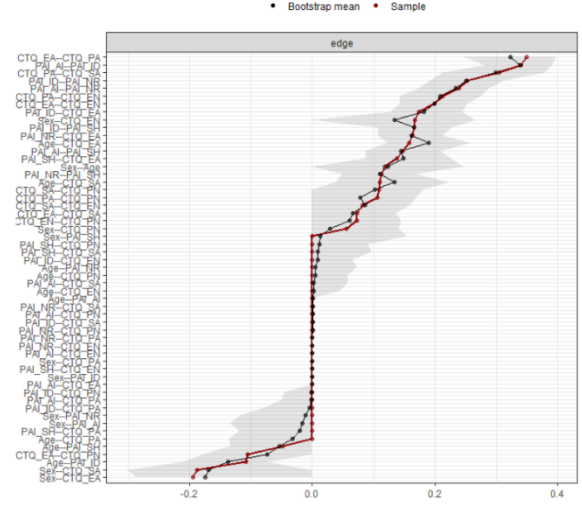

Fig. S10. Bootstrapped Difference Test of Edge Weights N3



## Supplementary Material Network N4 (N2 without PAI)

**Table S10**

*Parameters of Network Inference for N4*

| Measure                          | Labelling in NA | St-C  | Br-St | $R^2$ |
|----------------------------------|-----------------|-------|-------|-------|
| Sex                              | Sex             | .531  | .445  | .743  |
| Age                              | Age             | .453  | .368  | .102  |
| emotional abuse                  | CTQ_EA          | 1.354 | .860  | .647  |
| physical abuse                   | CTQ_PA          | .906  | .000  | .411  |
| sexual abuse                     | CTQ_SA          | .851  | .304  | .309  |
| emotional neglect                | CTQ_EN          | .504  | .210  | .315  |
| physical neglect                 | CTQ_PN          | .222  | .000  | .054  |
| attachment closeness             | ATT_AC          | .516  | .079  | .453  |
| attachment dependence            | ATT_AD          | 1.423 | .572  | .668  |
| attachment anxiety               | ATT_AA          | .714  | .299  | .477  |
| social support family            | SS_FA           | .981  | .727  | .540  |
| social support friends           | SS_FR           | .673  | .315  | .384  |
| social support significant other | SS_SO           | .616  | .201  | .277  |

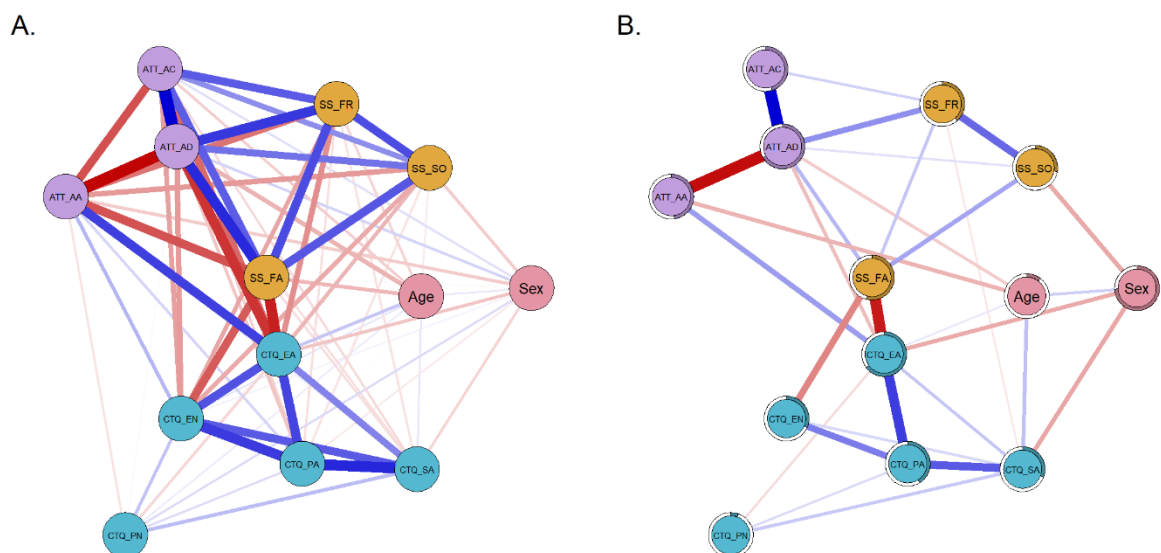

Fig. S11. Relations between the elements of network N4. A. Spearman correlation coefficients. B. Regularized partial correlation network, estimated via *mgm* with edges signifying unique associations between nodes. Note: In both figures the thickness of a line indicates the strength of the connection with blue colour indicating positive correlation and red the negative ones. The coloured part of the circular ring around the nodes represents the predictability of the node by its connected nodes ( $R^2$ ).

**Table S11***Spearman Correlations of Nodes in Network N4*

|        | Sex   | Age   | CTQ_EA | CTQ_PA | CTQ_SA | CTQ_EN | CTQ_PN | ATT_AC | ATT_AD | ATT_AA | SS_FA | SS_FR | SS_FR |
|--------|-------|-------|--------|--------|--------|--------|--------|--------|--------|--------|-------|-------|-------|
| Sex    |       | .035  | .000   | .053   | .000   | .000   | .002   | .005   | .000   | .000   | .661  | .926  | .000  |
| Age    | .063  |       | .000   | .790   | .019   | .028   | .091   | .000   | .000   | .921   | .000  | .000  | .070  |
| CTQ_EA | -.153 | .153  |        | .000   | .000   | .000   | .000   | .000   | .000   | .000   | .000  | .000  | .000  |
| CTQ_PA | -.060 | -.008 | .486   |        | .000   | .000   | .000   | .000   | .000   | .000   | .000  | .003  | .014  |
| CTQ_SA | -.114 | .071  | .327   | .565   |        | .000   | .000   | .001   | .005   | .140   | .003  | .011  | .935  |
| CTQ_EN | .038  | .065  | .455   | .514   | .434   |        | .000   | .000   | .000   | .000   | .000  | .000  | .000  |
| CTQ_PN | .095  | .051  | -.106  | .090   | .176   | .162   |        | .962   | .664   | .013   | .926  | .869  | .363  |
| ATT_AC | .085  | -.130 | -.395  | -.126  | -.101  | -.248  | -.001  |        | .000   | .000   | .000  | .000  | .000  |
| ATT_AD | .116  | -.200 | -.530  | -.150  | -.086  | -.265  | .013   | .666   |        | .000   | .000  | .000  | .000  |
| ATT_AA | -.135 | .004  | .500   | .112   | .046   | .193   | -.075  | -.456  | -.655  |        | .000  | .000  | .000  |
| SS_FA  | -.016 | -.189 | -.581  | -.175  | -.089  | -.432  | .003   | .423   | .558   | -.453  |       | .000  | .000  |
| SS_FR  | .000  | -.110 | -.294  | -.087  | -.075  | -.235  | -.005  | .432   | .520   | -.363  | .469  |       | .000  |
| SS_SO  | -.137 | -.054 | -.194  | -.072  | -.001  | -.223  | -.027  | .299   | .370   | -.267  | .441  | .464  |       |

Note. Spearman's correlation coefficients (below diagonal) and *p*-values (above diagonal).

**Table S12***Edge Weights in Network N4*

|        | Sex   | Age   | CTQ_EA | CTQ_PA | CTQ_SA | CTQ_EN | CTQ_PN | ATT_AC | ATT_AD | ATT_AA | SS_FA | SS_FR | SS_FR |
|--------|-------|-------|--------|--------|--------|--------|--------|--------|--------|--------|-------|-------|-------|
| Sex    |       |       |        |        |        |        |        |        |        |        |       |       |       |
| Age    | .085  |       |        |        |        |        |        |        |        |        |       |       |       |
| CTQ_EA | -.145 | .040  |        |        |        |        |        |        |        |        |       |       |       |
| CTQ_PA | .000  | .000  | .332   |        |        |        |        |        |        |        |       |       |       |
| CTQ_SA | -.152 | .108  | .099   | .284   |        |        |        |        |        |        |       |       |       |
| CTQ_EN | .000  | .000  | .000   | .225   | .069   |        |        |        |        |        |       |       |       |
| CTQ_PN | .000  | .000  | -.063  | .064   | .095   | .000   |        |        |        |        |       |       |       |
| ATT_AC | .000  | .000  | .000   | .000   | .000   | .000   | .000   |        |        |        |       |       |       |
| ATT_AD | .000  | -.089 | -.113  | .000   | .000   | .000   | .000   | .437   |        |        |       |       |       |
| ATT_AA | .000  | -.130 | .169   | .000   | .000   | .000   | .000   | .000   | -.415  |        |       |       |       |
| SS_FA  | .000  | .000  | -.392  | .000   | .000   | -.210  | .000   | .000   | .125   | .000   |       |       |       |
| SS_FR  | .000  | .000  | .000   | .000   | -.044  | .000   | .000   | .079   | .192   | .000   | .098  |       |       |
| SS_SO  | -.148 | .000  | .000   | .000   | .000   | .000   | .000   | .000   | .052   | .000   | .156  | .260  |       |

Note. Partial correlation coefficients.

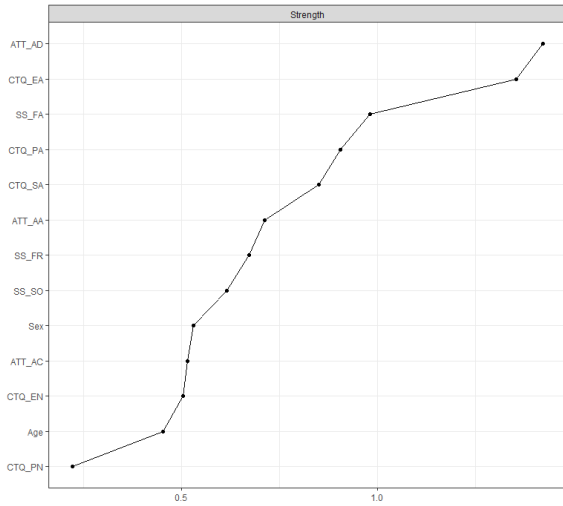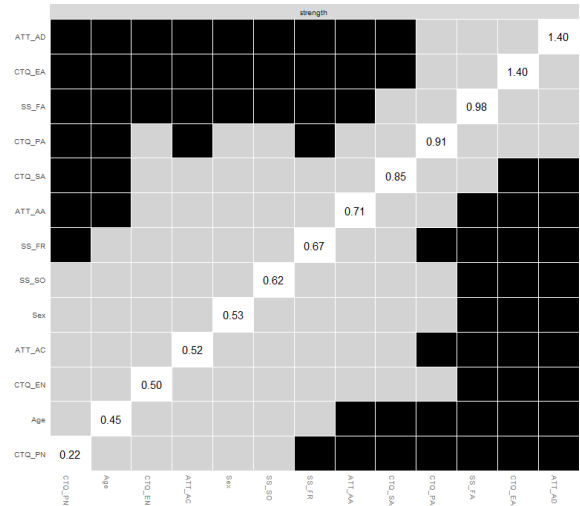

Fig. S12. Centrality values and bootstrapped difference test of network N4.

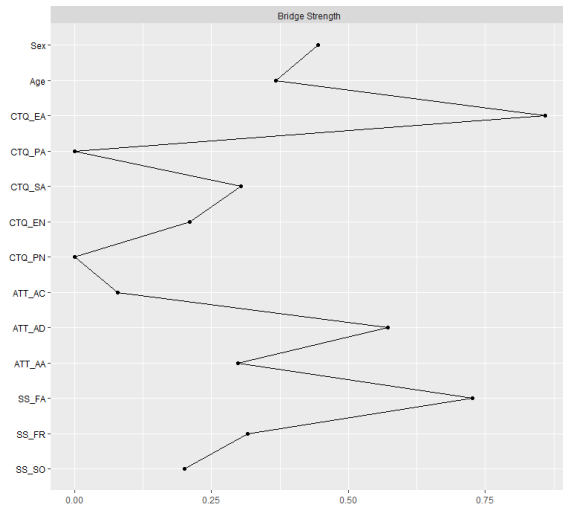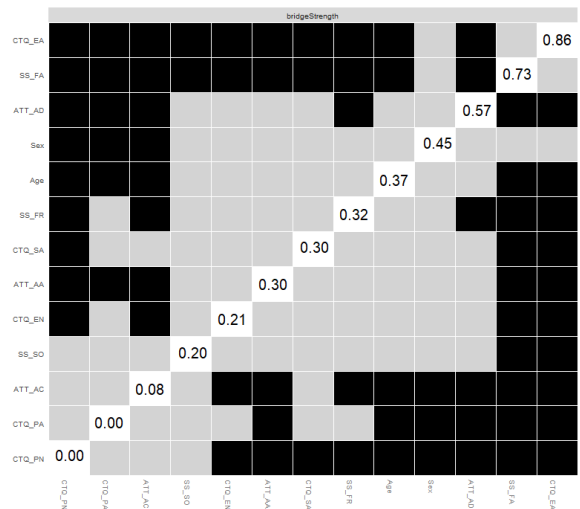

Fig. S13. Bridge Strength and bootstrapped difference test of network N4.

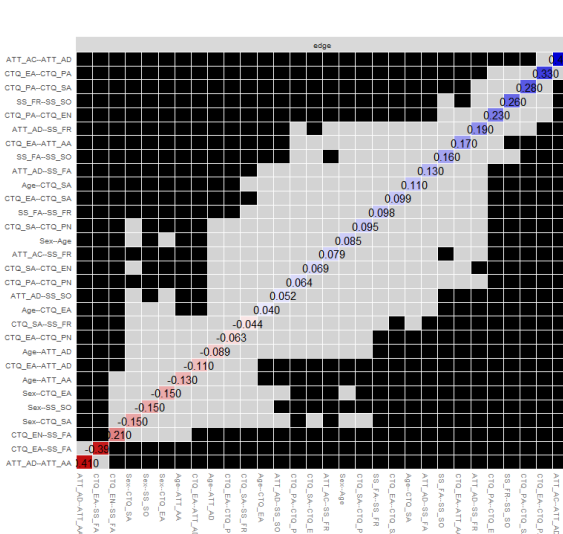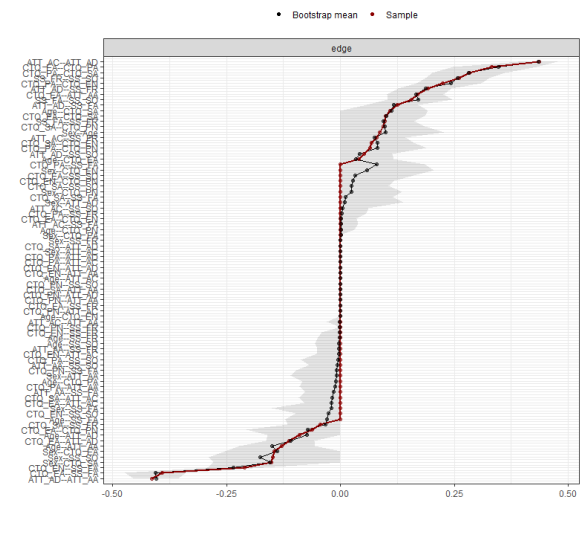

Fig. S14. Edge Weights and bootstrapped difference test of network N4.
